# Supplementary material for: Thioglycolic acid-modified AuNPs as a colorimetric sensor for the rapid determination of the pesticide chlorpyrifos
Source: Royal Society of Chemistry journal article supplement (doi:10.1039/d2ay00237j), 2022-01-01
Supplement: d2ay00237j1.pdf [file d2ay00237j1.pdf]

## Supporting Information

### **Thioglycolic acid-modified AuNPs as a colorimetric sensor for the rapid determination of the pesticide chlorpyrifos**

Hongwei Zhang<sup>a</sup>, Yuan Qu<sup>a</sup>, Yanchao Zhang<sup>a</sup>, Yumei Yan<sup>a</sup> and Haixiang Gao<sup>\*a</sup>

Department of Applied Chemistry, China Agricultural University, Yuanmingyuan West Road 2#, Haidian District, Beijing 100193, China

#### **Corresponding authors**

\*E-mail: hxgao@cau.edu.cn

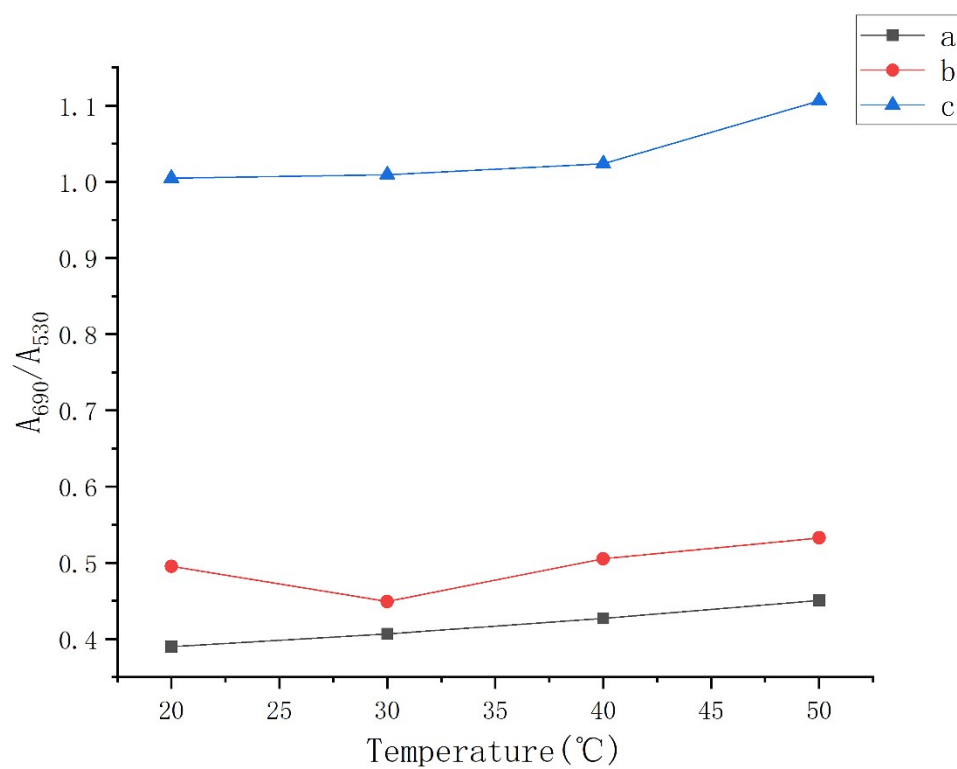

**Fig. S1.** Dependence of the temperature on the absorption ratio ( $A_{690}/A_{530}$ ) of TGA@AuNPs in the (a) absence and (b) presence of  $0.01 \mu\text{g}\cdot\text{L}^{-1}$  (c) presence of  $0.05 \mu\text{g}\cdot\text{L}^{-1}$  chlorpyrifos.

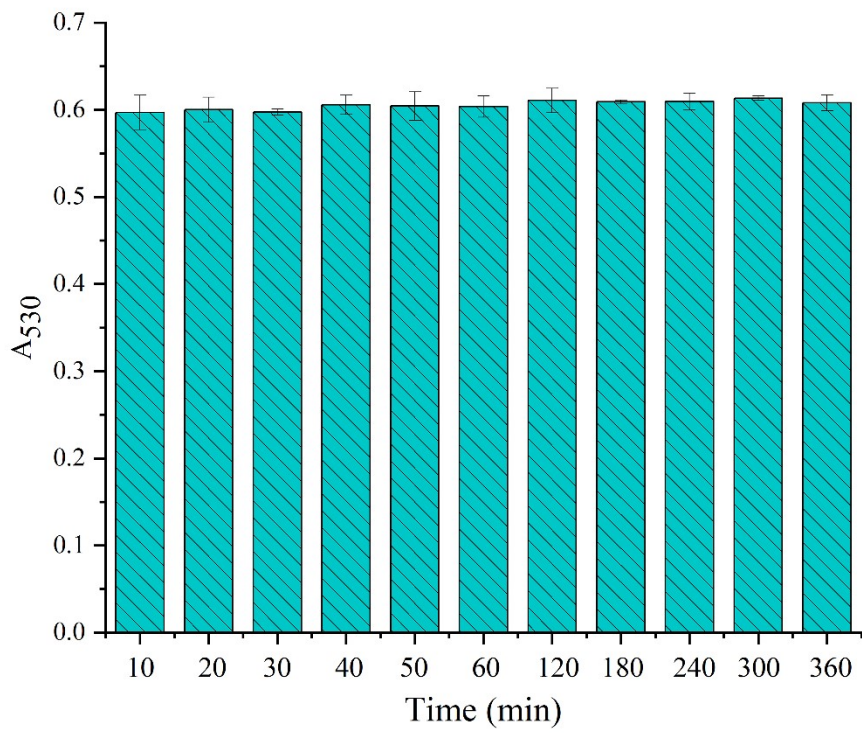

**Fig. S2.** Dependence of the modification time of thioglycolic acid on the absorption ( $A_{530}$ ) of AuNPs.

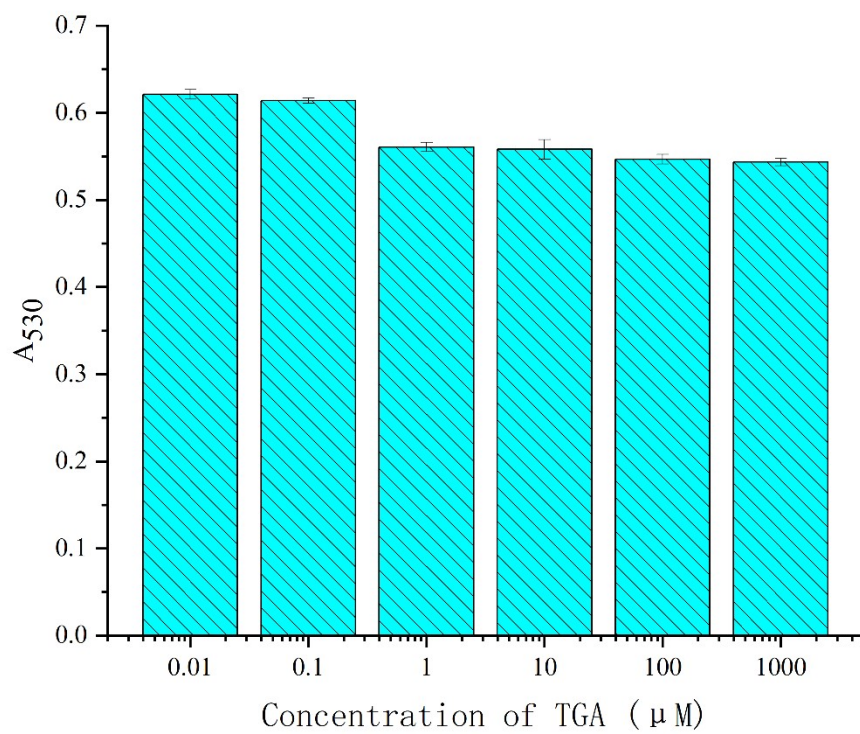

**Fig. S3.** Dependence of the concentration of TGA on the absorption ratio ( $A_{690}/A_{530}$ ) of TGA@AuNPs.

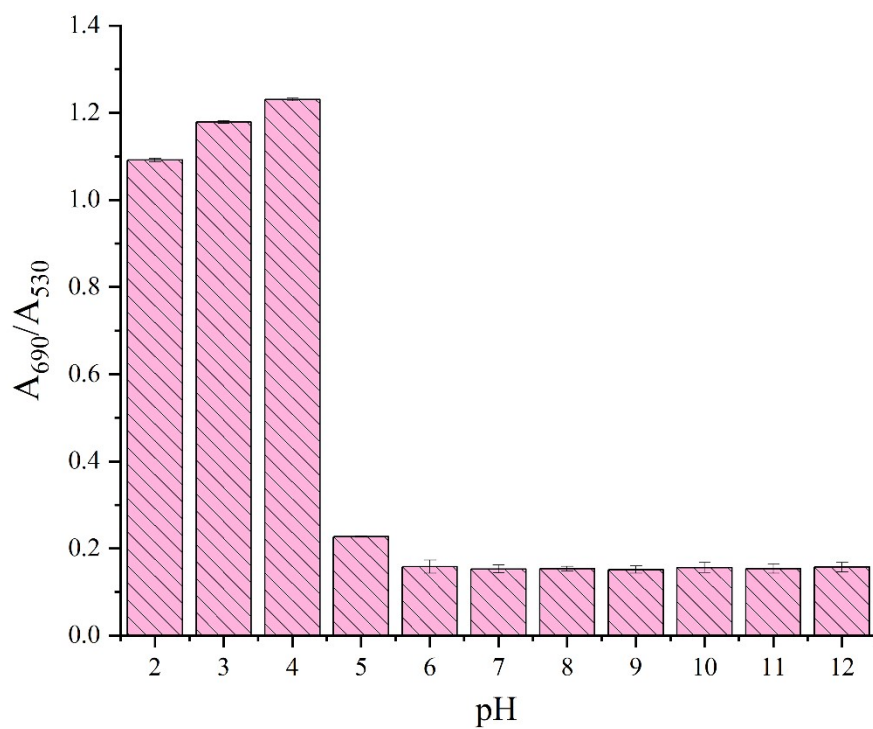

**Fig. S4.** Dependence of the pH on the absorption ratio ( $A_{690}/A_{530}$ ) of TGA@AuNPs.

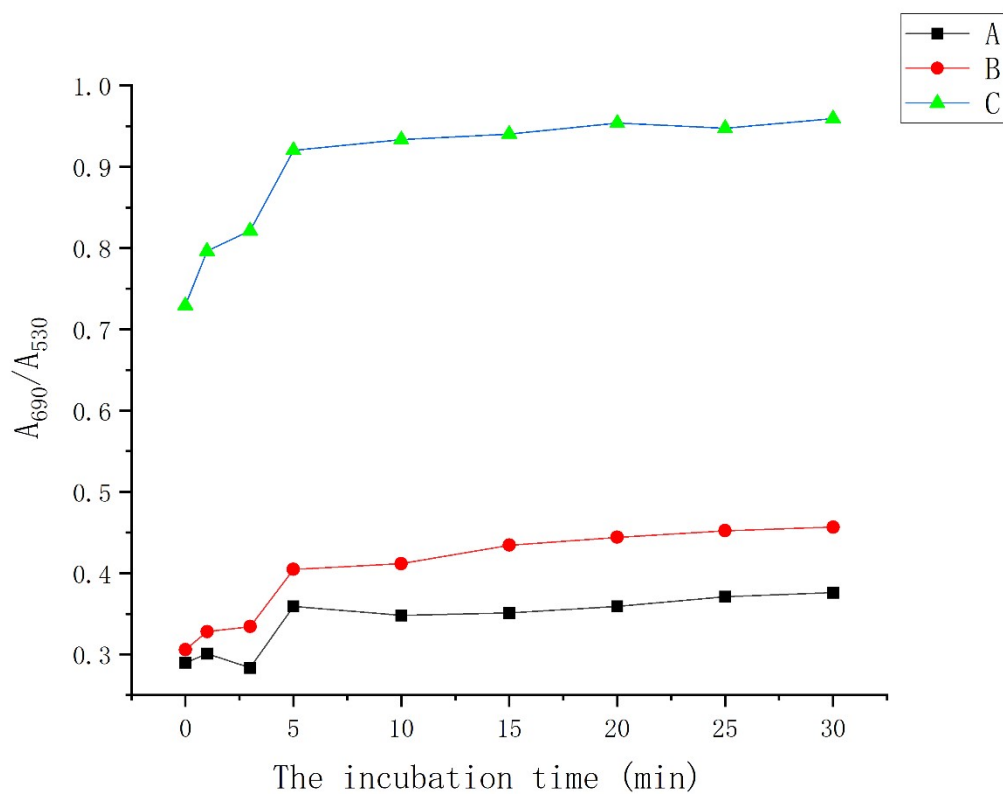

**Fig. S5.** Dependence of the incubation time on the absorption ratio ( $A_{690}/A_{530}$ ) of TGA@AuNPs in the (A) absence and (B) presence of  $0.01 \mu\text{g}\cdot\text{L}^{-1}$  (C) presence of  $0.05 \mu\text{g}\cdot\text{L}^{-1}$  chlorpyrifos.

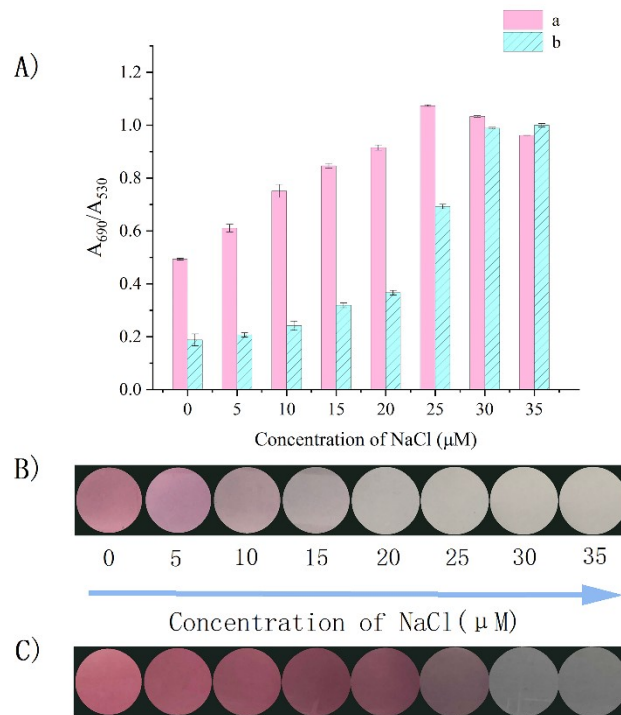

**Fig. S6.** (A) Dependence of the concentration of NaCl on the absorption ratio ( $A_{690}/A_{530}$ ) of TGA@AuNPs in the (a) presence of 30.0  $\mu\text{g}\cdot\text{L}^{-1}$  (b) presence of 0  $\mu\text{g}\cdot\text{L}^{-1}$  chlorpyrifos. (B) System changes under the addition of 0  $\mu\text{g}\cdot\text{L}^{-1}$  chlorpyrifos. (C) System changes under the addition of 30.0  $\mu\text{g}\cdot\text{L}^{-1}$  chlorpyrifos

**Table S1.** Zeta Potential of gold nanoparticles and thioglycolic acid @goldnanoparticles based colorimetric sensor in the absence and presence of 50.0  $\mu\text{g}\cdot\text{L}^{-1}$

| <b>Samples</b>             | <b>AuNPs</b>    | <b>TGA@AuNPs</b> | <b>TGA@AuNPs+Chlorpyrifos(50<math>\mu\text{g}\cdot\text{L}^{-1}</math>)</b> |
|----------------------------|-----------------|------------------|-----------------------------------------------------------------------------|
| <b>Zeta Potential (mV)</b> | -10.8 $\pm$ 1.2 | -3.7 $\pm$ 3.3   | 0.9 $\pm$ 1.6                                                               |

Mean $\pm$ SD , n=3



**Table S2.** Comparison with other methods based on the sensor for chlorpyrifos detection

| Methods               | Linear range<br>( $\mu\text{g/L}$ ) | LOD<br>( $\mu\text{g/L}$ ) | Time     | Recovery<br>(%) | Ref.         |
|-----------------------|-------------------------------------|----------------------------|----------|-----------------|--------------|
| GC-MS                 | 2.50-501.34                         | 1.6                        | 13.3 min | 83-95           | 1            |
| Spectrofluorimetric   | 0.50-2.50                           | 0.15                       | 20 s     | 102.6–<br>104.2 | 2            |
| DLLME/HPLC-UV-<br>Vis | 0.27-1090.32                        | 5.01                       | 5 min    | 87.3–<br>117.6  | 3            |
| DPV                   | 0.007-35058                         | 0.09                       | 10 s     | NM              | 4            |
| PEC                   | 17.53-3505.86                       | 0.34                       | 15 min   | 96–<br>101.2    | 5            |
| MIP/Flow cytometry    | 20.02-200.18                        | 9.99                       | 120 min  | 92.8            | 6            |
| Colorimetry           | NM                                  | 5.12                       | NM       | 96.2-<br>105.6  | 7            |
| Colorimetry           | 0.4-100                             | 20                         | 2 min    | 98-104.3        | This<br>work |

NM: Not mentioned

**References:**

- 1 RACKE K D, *Organophosphates Chemistry, Fate, and Effects*, **1992**, 47-78.
- 2 Çubuk, S., Kök Yetimoğlu, E., Çalışkan, A. and Vezir Kahraman, M, *Microchemical Journal*, 2021, **165**, 106098.
- 3 Handajani, U., Y. Raharjo and B. Wantoro, *Journal of Chemical Technology and Metallurgy*, 2017, **52**, 1056-1061.
- 4 Fischer, J., A. Hájková., M. Pereira., M. Křeček., V. Vyskočil and J. Barek, *Electrochimica Acta*, 2016, **216**, 510-516.
- 5 Wang, P., W. Dai, L. Ge, M. Yan, S. Ge and J. Yu, *Analyst*, 2013, **138**, 939-945.
- 6 Zhang, H., P. Wang, Q. Zhou and Y. Wang, *Analytical Letters*, 2018, **51**, 921-934.
- 7 Liu, Y., T. Li, G. Yang, Y. Deng, X. Mou and N. He, *Chinese Chemical Letters*, 2021, DOI: 10.1016/j.ccllet.2021.11.025
